# Supplementary material for: Cytocompatible in situ cross-linking of degradable LbL films based on thiol–exchange reaction
Source: PubMed Central journal article supplement — Chem Sci. 2015 May 18;6(8):4698–703. doi: 10.1039/c5sc01225b (PMC5500856; doi:10.1039/c5sc01225b), 2015-05-18
Supplement: SC-006-C5SC01225B-s001.pdf [file SC-006-C5SC01225B-s001.pdf]

## SUPPORTING INFORMATION

### **Cytocompatible In Situ Cross-Linking of Degradable LbL Films Based on Thiol-Exchange Reaction**

Sung Ho Yang,<sup>\*</sup> Jinsu Choi, L. Palanikumar, Eun Seong Choi, Juno Lee, Juan Kim, Insung S. Choi,<sup>\*</sup> and Ja-Hyoung Ryu<sup>\*</sup>

#### **CONTENTS**

**Table S1.** Zeta potential measurement of MSNP@CLM<sup>n/m</sup>.

**Table S2.** Concentration of pyridinethione in the supernatant.

**Table S3.** Dynamic light scattering (DLS) measurement of MSNP@CLM<sup>n/n</sup>.

**Figure S1.** UV-Vis spectra of the supernatant.

**Figure S2.** UV-Vis spectra for Ellman's test.

**Figure S3.** DLS analysis for examining the colloidal stability of MSNP@CLM<sup>5/5</sup>.

**Figure S4.** Viability of HeLa cells.

**Figure S5.** Viability of HeLa cells with Dox.

**Table S1.** Zeta potential measurement of of MSNP@CLM<sup>n/m</sup>.

| <b>Sample</b>           | <b>Zeta Potential (mV)</b> |
|-------------------------|----------------------------|
| MSNP@CLM <sup>1/0</sup> | 3.93±0.40                  |
| MSNP@CLM <sup>1/1</sup> | -40.03±0.35                |
| MSNP@CLM <sup>2/1</sup> | 3.54±0.28                  |
| MSNP@CLM <sup>2/2</sup> | -32.78±0.64                |
| MSNP@CLM <sup>3/2</sup> | 3.85±0.34                  |
| MSNP@CLM <sup>3/3</sup> | -29.62±0.74                |
| MSNP@CLM <sup>4/3</sup> | 5.85±0.24                  |
| MSNP@CLM <sup>4/4</sup> | -35.77±0.24                |
| MSNP@CLM <sup>5/4</sup> | 6.11±0.11                  |
| MSNP@CLM <sup>5/5</sup> | -32.41±0.52                |

**Table S2.** Concentration of pyridinethione (byproduct) in the supernatant.

| <b>Sample</b>           | <b>Concentration (M)</b> |
|-------------------------|--------------------------|
| MSNP@CLM <sup>1/1</sup> | 3.37×10 <sup>-4</sup> M  |
| MSNP@CLM <sup>2/1</sup> | 2.04×10 <sup>-4</sup> M  |
| MSNP@CLM <sup>2/2</sup> | 1.91×10 <sup>-4</sup> M  |
| MSNP@CLM <sup>3/2</sup> | 2.12×10 <sup>-4</sup> M  |
| MSNP@CLM <sup>3/3</sup> | 2.66×10 <sup>-4</sup> M  |
| MSNP@CLM <sup>4/3</sup> | 2.63×10 <sup>-4</sup> M  |
| MSNP@CLM <sup>4/4</sup> | 4.40×10 <sup>-4</sup> M  |
| MSNP@CLM <sup>5/4</sup> | 3.27×10 <sup>-4</sup> M  |
| MSNP@CLM <sup>5/5</sup> | 4.43×10 <sup>-4</sup> M  |

**Table S3.** Dynamic light scattering (DLS) measurement of MSNP@CLM<sup>n/n</sup>.

| <b>Sample</b>           | <b>Particle size (nm)</b> |
|-------------------------|---------------------------|
| MSNP@CLM <sup>1/1</sup> | 112.3±1.72                |
| MSNP@CLM <sup>2/2</sup> | 151.0±3.00                |
| MSNP@CLM <sup>3/3</sup> | 159.6±2.54                |
| MSNP@CLM <sup>4/4</sup> | 168.8±4.40                |
| MSNP@CLM <sup>5/5</sup> | 185.0±10.00               |

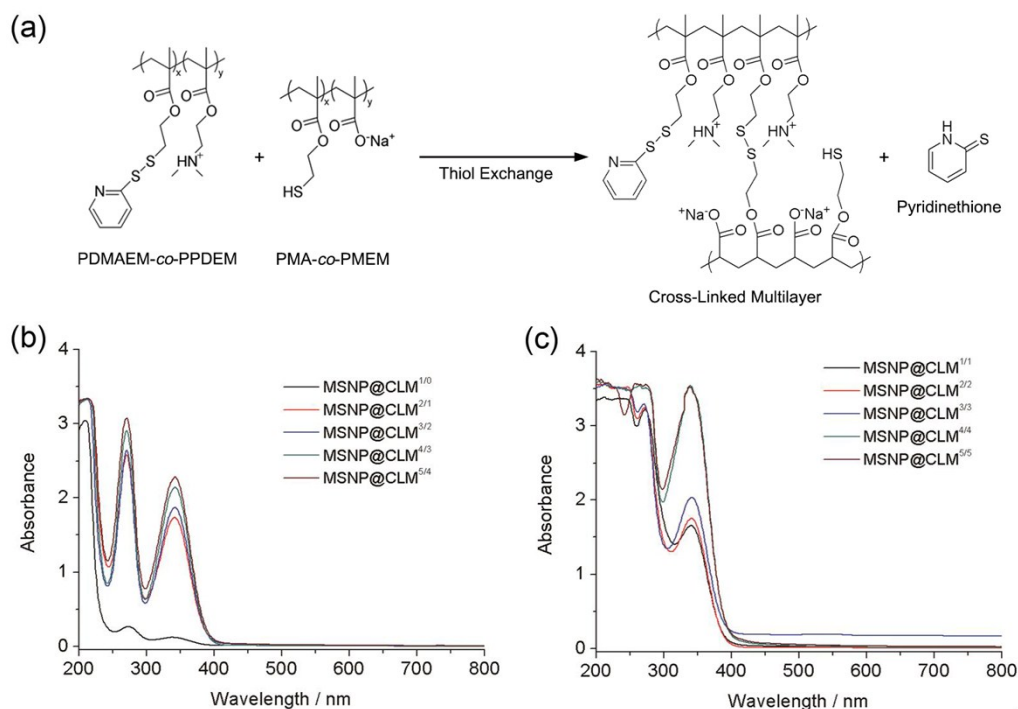

**Figure S1.** (a) Scheme for *in situ* cross-linking reaction generating pyridinethione as a byproduct. (b and c) UV-Vis spectra for pyridinethione after CLM formation. The absorption at 343 nm was used to measure the amount of pyridinethione. (b) UV-Vis spectra after coating with the disulfide-containing polymer, PDMAEM-co-PPDEM. (c) UV-Vis spectra after coating with the thiol-containing polymer, PMA-co-PMEM.

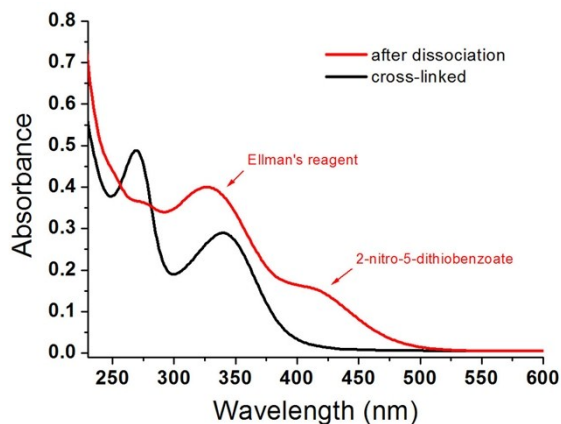

**Figure S2.** (a) UV-Vis spectra of the phosphate-buffered solutions (pH 7.4) of PDMEAM-co-PPDEM (0.1 mg/mL) and PMA-co-PMEM (0.1 mg/mL) in the presence of Ellman's reagent (50 mM) before and after 30 min GSH-treatment (1 mM). To remove the remaining GSH, from the solution, the polymer was purified by dialysis before UV-Vis analysis.

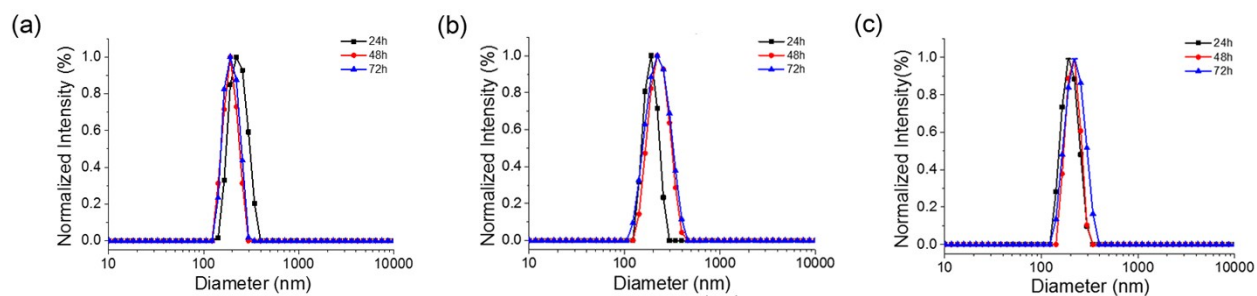

**Figure S3.** DLS measurements of MSNP@CLM<sup>5/5</sup> in (a) sodium acetate buffer (pH 5.0), (b) phosphate-buffered saline (pH 7.4), and (c) RPMI 1640 with 10% FBS medium after 24 h, 48 h and 72 h of immersion. The size of MSNP@CLM<sup>5/5</sup> was not changed during the periods of time, indicating the long-term colloidal stability of the particles in the biocompatible environments.

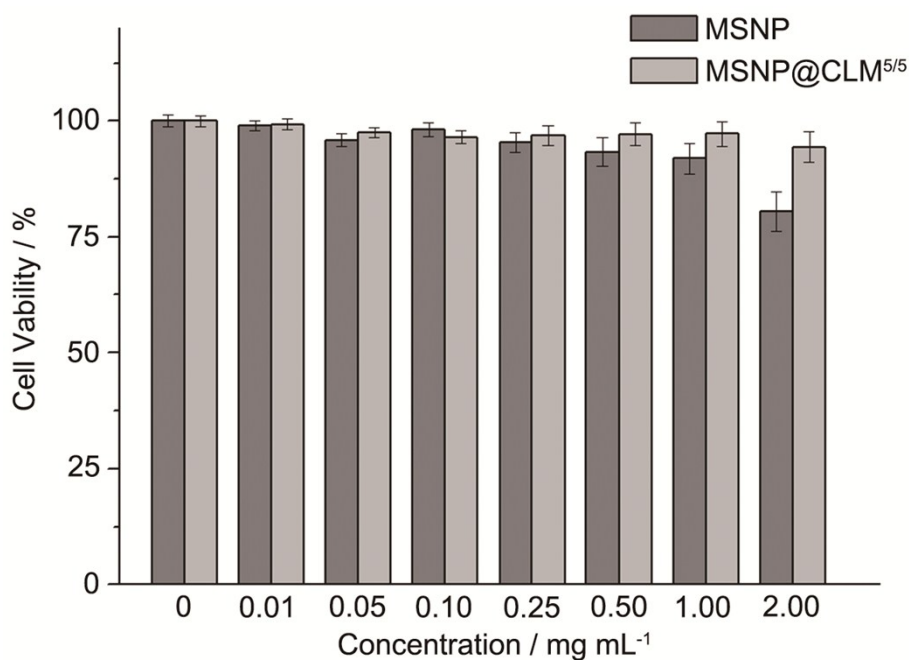

**Figure S4.** Viability of HeLa Cells with different concentrations of MSNPs and MSNP@CLM<sup>5/5</sup> after 24-h incubation.

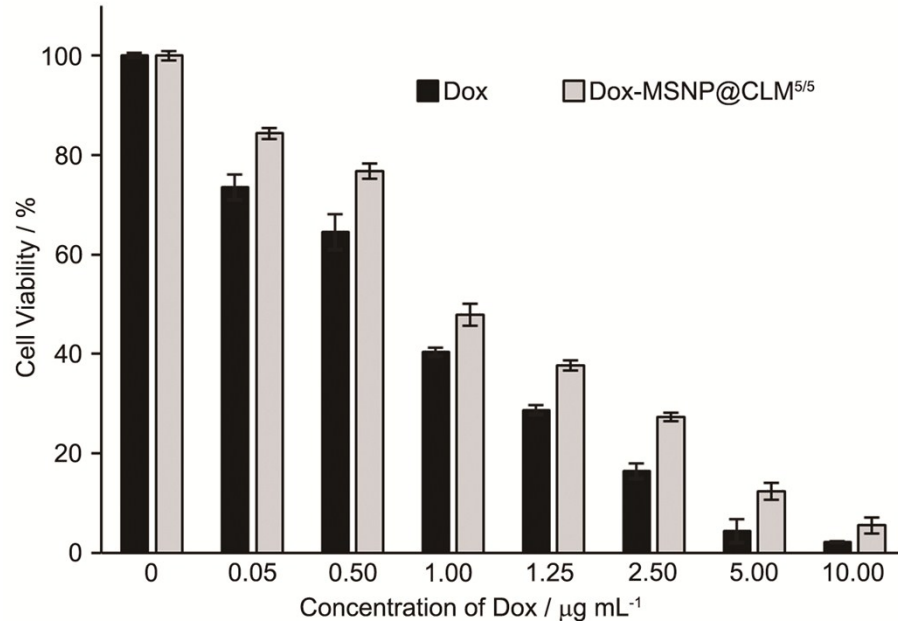

**Figure S5.** Cell-viability analysis of HeLa cells after 24 h of incubation with Dox-containing MSNP@CLM<sup>5/5</sup>.
